# Supplementary figures and images for: Disc1 regulatesfoxd3andsox10expression, affecting neural crest migration and differentiation
Source: Oxford University Press journal article supplement (doi:10.1242/dev.030577), 2009-07-02

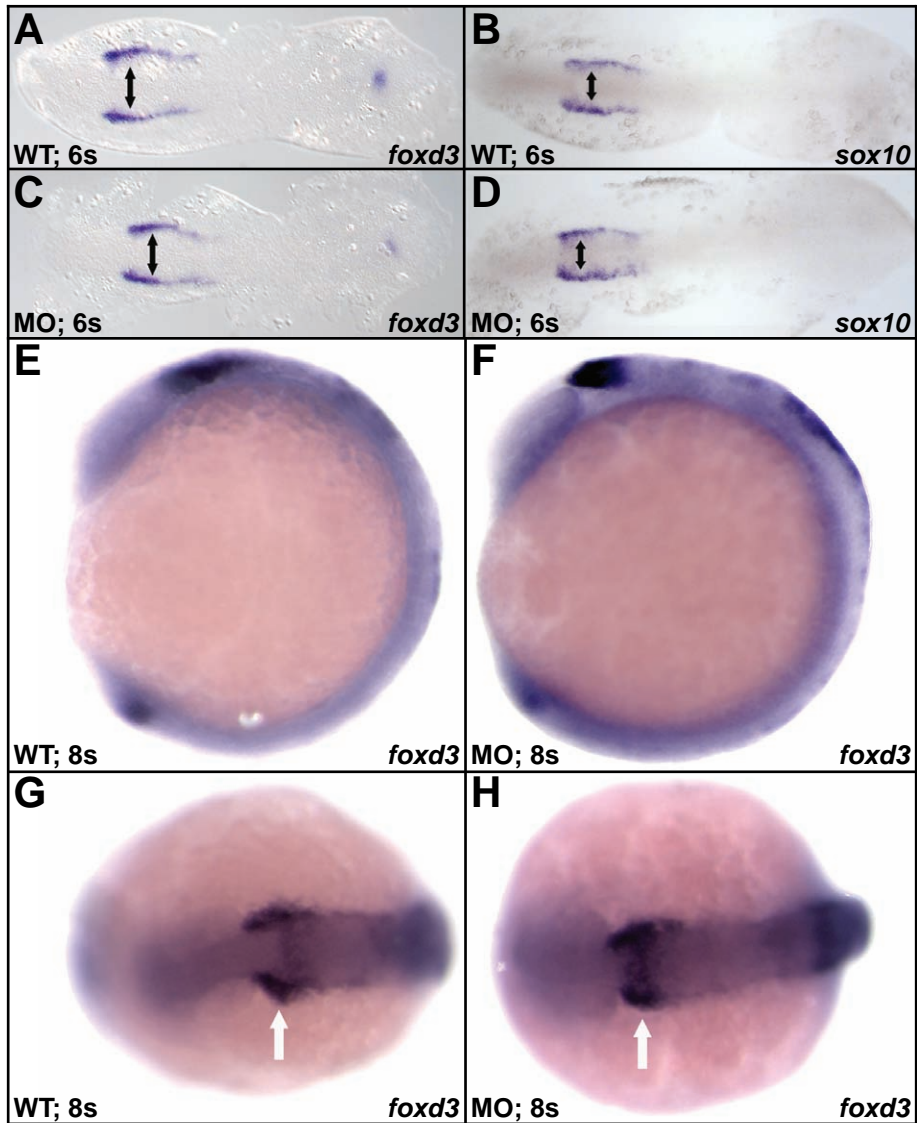

Supplement: dev030577-sup-030577-figs3.pdf [file dev030577-sup-030577-figs3.pdf]

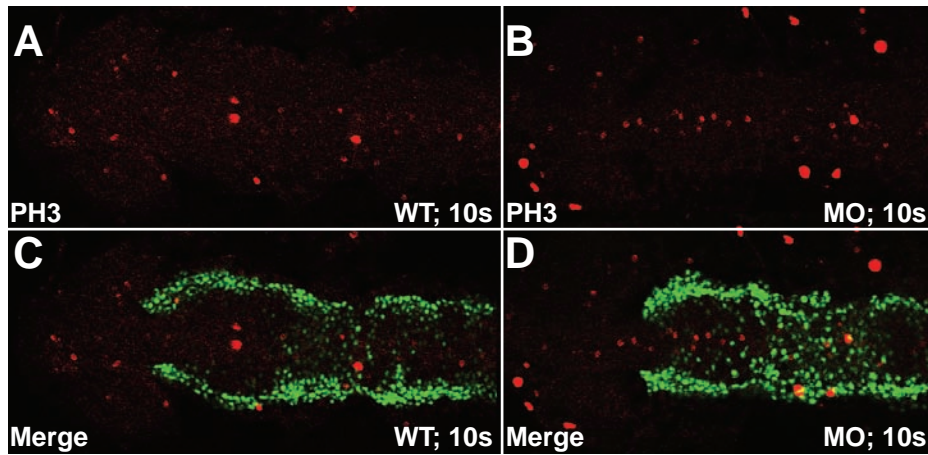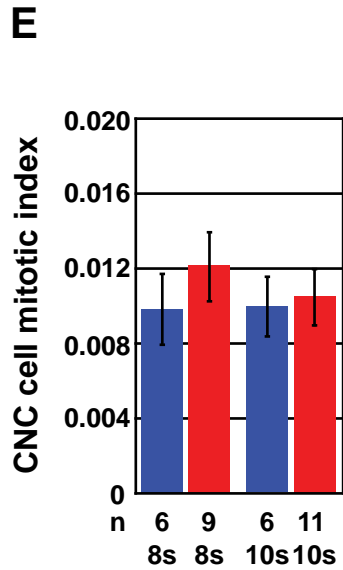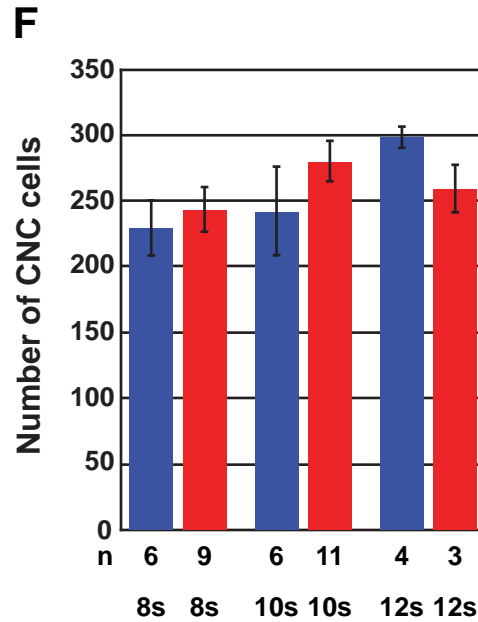

■ wild-type ■ morphant

Supplement: dev030577-sup-030577-figs4.pdf [file dev030577-sup-030577-figs4.pdf]

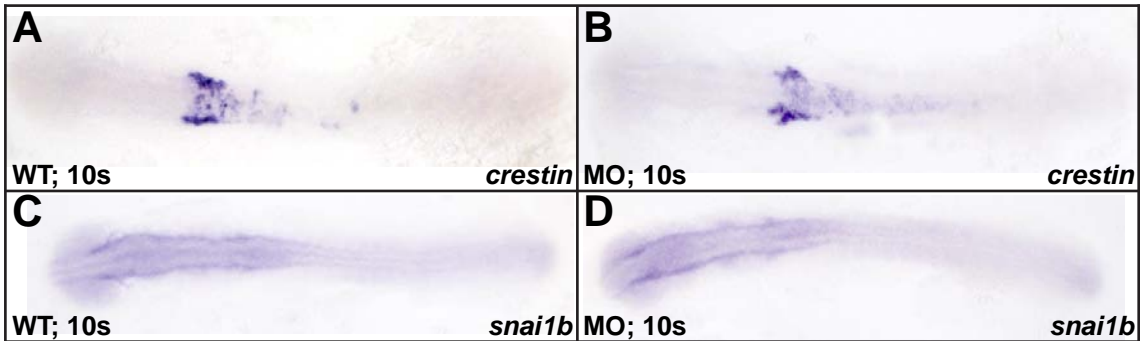

Supplement: dev030577-sup-030577-figs6.pdf [file dev030577-sup-030577-figs6.pdf]

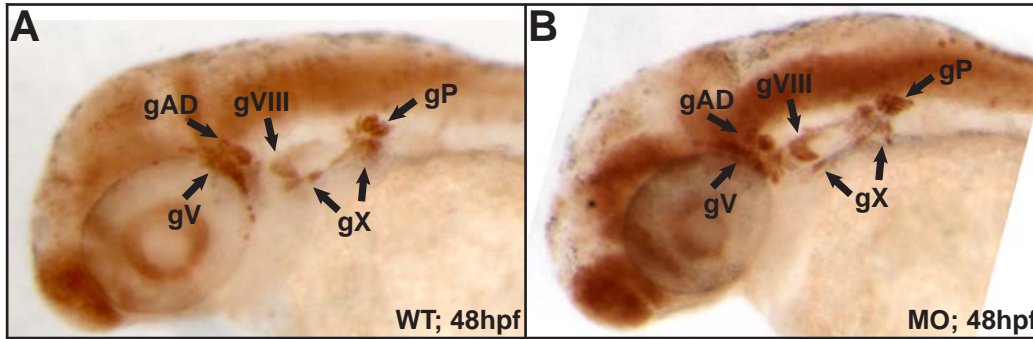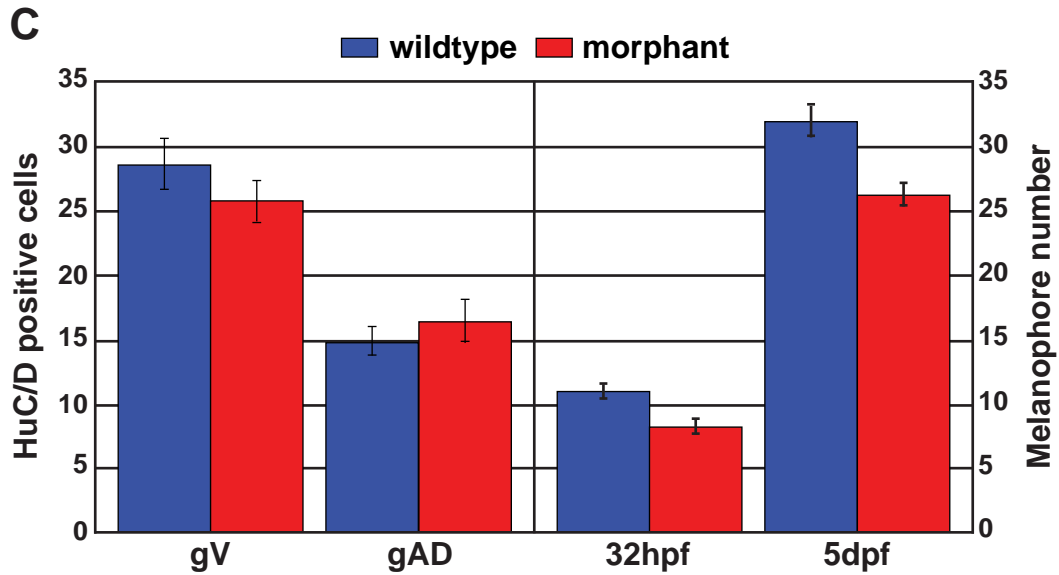

Supplement: dev030577-sup-030577-figs7.pdf [file dev030577-sup-030577-figs7.pdf]
